# Supplementary material
Source: publisher figshare collection journal article supplement (https://sage.figshare.com/ndownloader/files/14182667)
Supplement: Supplementary file 1 [file 14182667]

| Authors | Selection Bias | Study Design | Confounders | Blinding | Data Collection | Withdrawal | Intervention Integrity | Analyses | Global Assessment |
| --- | --- | --- | --- | --- | --- | --- | --- | --- | --- |
| Allen, 2003 * | 1 | 2 | 1 | 2 | 3 | n/a | 2 |  | 2 |
| Bruzzese et al., 2006 * | 1 | 1 | 1 | 2 | 1 | 3 | 1 | 1 | 2 |
| Engelke, Guttu, Warren & Swanson, 2008 | 3 | 3 | 1 | 3 | 2 | n/a | 1 | 1 | 3 |
| Harrington et al., 2018 | 1 | 1 | 1 | 3 | 3 | 1 | 1 | 2 | 3 |
| Izquierdo et al., 2009 | 1 | 1 | 1 | 3 | 3 | 3 | 1 | 2 | 3 |
| Levy, Heffner, Stewart, & Beeman | 3 | 1 | 1 | 2 | 3 | 2 | 2 | 1 | 3 |
| Morrica et al., 2013 | 3 | 2 | 3 | 3 | 1 | 1 | 1 |  | 3 |
| Morton & Schultz, 2004 * | 1 | 1 | 1 | 3 | 2 | 1 | 1 | 1 | 2 |
| Noyes et al., 2013 | 2 | 1 | 1 | 2 | 3 | 3 | 3 | 1 | 3 |
| Pennington & Delaney, 2008 | 1 | 2 | 1 | 3 | 3 | n/a | 1 | 1 | 3 |
| Rodriguez et al., 2013 | 1 | 1 | 1 | 3 | 3 | 1 | 1 | 1 | 3 |
| Splett, Erickson, Belseth & Jensen, 2006 | 3 | 1 | 1 | 3 | 3 | 3 | 1 | 1 | 3 |
| Tellijohan, Dake, & Price, 2004 | 1 | 2 | 1 | 3 | 3 | 1 | 1 | 1 | 3 |
| Trivedi et al., 2017 | 2 | 2 | 1 | 3 | 3 | 1 | 1 | 1 | 3 |
| Van Cura, 2010 | 1 | 2 | 1 | 3 | 3 | 1 | 1 | 2 | 3 |
| Wiggs-Stayner et al., 2006 | 1 | 1 | 1 | 3 | 3 | N/a | 1 | 1 | 3 |

Supplemental Table. *Quality Assessment Tool for Quantitative Studies Rating*

* Moderate quality study (one weak rating); Component quality: Strong = 1, moderate = 2, weak = 3
